# Supplementary material for: Systematic analysis of the OSCA family members in Vigna radiata and their involvement in osmotic resistance
Source: Research Square preprint supplement (doi:10.21203/rs.3.rs-191826/v1), 2021-02-01
Supplement: Supplementary file 1 [file 034abd72a3830f3fe6f5768b.xlsx]

## Sheet: Sheet1
Additional file 4: The sequences of the 20 motifs by motif analysis of VrOSCAs.
Motif	Motif name	Sequence (Regular expression)
Motif 1	KSFITGYLPGLILKJFLIFLPPILMJMSKFEGYISRSSJERSAASKYYYFTVWNVFFGNVLTG	[KS][QS][FIV][IV][TQ]G[FY]LP[GS][LIV][AI]L[KQ][LI]FL[IY][FV][LV]P[PT]I[LM]MI[ML]S[KS][FI][EQ]G[YF]ISRSS[LI]E[RK][SR][AS][AC][ST][KR][VY][YL][YW]FT[VIL][WV]N[VI]F[FL][GA][NS][VI][LFI][TS]G
Motif 2	AAQTQQSRNPTLWLTEWAPEPRDVYWPNL	[AC]AQ[TI][QL]Q[ST][RSV]NPTLW[LIV]T[ED]WAPEPRDVYW[PRS][NF][LF]
Motif 3	RFWVHIVAAYVFTFWTCYLLYKEYKYIASMRLAFLASEKRRPDQFTVLVRNIPPDPDESVSETVEHFFLVNHPDHYLSHQ	[RW][FL]W[AV]H[IF][VA][AM][AV]Y[AVI]F[TS][FG]W[TIV]CY[LI]LYKEY[KE][YK][IV][AS][SAT][MK]R[LI][AHS][FY][LF][AY][SA][ES][KR][RP][RQ]P[DH][QH]FT[VI]LVR[NGS][IV]P[PV][DPS][PS][DG][ES]S[VC][ST][ED][LST]VE[HR]FF[LS][VE][NY]HP[DS][HT]YL[ST]HQ
Motif 4	RYLPFLNWVPKAWEMPEEELJSHAGLDSVVFLRIYLFGLKIFVPIAVJALLVLVPVNYTGST	[RST][YLF][LVI][PR][FST][LAP][NGS]W[MVI]P[KAQ]A[WL][ER][MT][PST]E[EP]E[LFI][IL][DS][HT][AGS]GLD[SA][AVF]V[FY][LM]R[IM][YF][LVT][FLI][GS][LI][KR][IV]F[VAST][PFV][IAG][AGT][FVL][ILV][AGC][LFMW][LAI][VIL][LV][VL]P[VI]N[WYC]T[GS][SNRT][QTDG]
Motif 5	WPDVHNRIIFALIVSQIILLGLLGTKKAASASPFLIPLPILTJLFHKYCKGRFEPAFVKYPLQEAMMKDTLERATEPN	WP[DI][IVA]H[NF][RT][IT][IV][FL][AS]L[ILV][VIL][SM]Q[ILV][ILV][LA][LM]G[LV][FL][GST][TL]K[KR][AS][APS][SV][AS][ST][PG][FL][LT]I[PV]L[PL][IV]LT[IL][LAW]F[HN][EKQ]YC[KR][GQ]RF[EL]P[AI]F[VK]K[YN][PS][LA][QE]E[AL][MI][MD][KM]D[TMR][LR][DE][ER]A[CT][EG][PR][MN]
Motif 6	SIPMKASFFITYIMVDGWAGIAAEILRLKPLIIYHLKNFFLVKTEKDREEAMDPGSJGFNTGEPRIQLYFLLGLVYAVVTPFLLPFIIVFFGLAYVVYRH	[SA]IP[ML]KA[ST]FFITYIMVDGWAGIA[AG]E[VI]L[RM]L[KV]PLI[IF]YHLKNFFLVKTE[KR]DREEAMDPGS[IL][GD]F[NA]TGEPRIQLYFLLGLVYA[VA]VTPF[LV]LPFIIVFFGLAY[VL]V[FY]RH
Motif 7	SAJLTSAGINILLAFLFFTLFAILRKQPSNDRVYFPKWYLK	[SA][AD][LI][LG][TL]S[AV][GA]IN[IL][LAG][LS][AC][FLV][LV][FL][FL][ST][AL][FY][AS][IV]LR[KL]QPSNDRVYFP[KR][WLR][YL][LA][KES]
Motif 8	AIPYVSLWIRRLVVFVAFFFLTFFFMIPIAFVQGLANJEGJZKMFPFLKPIIRIKFI	A[IV]P[YF]V[SQ][LR][WT]IR[RK]L[VI]VFVAFFFLTFFF[ML]IP[IV][AT]FVQ[GS]L[AT]N[LI][ED][GK][LI][EQ]KM[FA]PFLK[PG]I[IL]RI[KP][FV][IV]
Motif 9	KLPKKEMPAAFVSFKSRWGAA	[KS][LD]PKK[EI]MPAAFV[SF]FK[ST]RWGAA
Motif 10	HSEIPRILLFGLLGVTYFILAPLILPFLLVYFCLGYIIYRN	H[ST]E[IV]PR[IV]L[LF]FG[LF]LG[FV]T[YC][FS]ILAPLILPFLL[VF]YFCL[AG]Y[IL][IV]YRN
Motif 11	NTSPRPQRKTGFLGLWGRKVDAIDHYTDEINELSKEIELER	[NR]T[SG][KPT]R[PR][QT][IR][KR][TD]G[FC]LGL[WC]GRKVDA[IV]D[HY][YH][ENT]DE[IL][GN][DER][LI]S[KD][EN][IV][ER]LE[QR]
Motif 12	EPKEJPAQLAEAVPAQASFFITYVLTSGWTSJASELFQLIPLLYNIIKRFFYGSNED	[ES]P[KT]E[IL]P[AR]QLA[EK]AVP[AS]QA[ST]FF[IT][TA]YV[LV][TS]SGW[TA]S[IL][AS]SE[LV]FQL[FI]PLLCNI[FI][KQ]RF[FI][LY][GR]XNED
Motif 13	SBITYSSJDKLSISNVNNGSE	[SK][ND][FIL]TFS[SD][LI]D[KSV][FL][ST]ISN[VI][NP]NGSX
Motif 14	QIINVYNQEYESAGA	QIINVYN[QPT][EKT]Y[ED][ST][AG][AG][AQ]
Motif 15	VYNANKLSKLVKKKKKLQNWLDYYQLKLE	V[YH][ND]A[NK]K[LF][SA][KS]L[VA][KS][KR][KR][KE][KR][LT][QK]NWL[DV]YY[QE][LN]K[LSY][ES]
Motif 16	AFQQLDSFJHQPANEYPVTIG	AF[QE]QL[DHQS][SAKQ]F[LI][HN]Q[PST][APS][NT][EQ][IYF][PT][VIKR]T[IV]G
Motif 17	NLYEYLANAYNHPAL	[NEQ][FIL][YK][EAD][YN]L[AQ][NS]AY[NCV][HDQ]P[AISV][LF]
Motif 18	PSPPHHLH	[PS]S[PL]PHHL[HP]
Motif 19	GLRSDPVQGGAFVSKFVNLDW	G[LG]R[ST][DS]P[VLR][QHS][GAS][GER][ALN]FV[SGR]KF[VI]NL[DN][FW]
Motif 20	WWESESVVVRTKRQSRKNTPLPSR	[DKW][EFW]E[QST]E[SP][AIV][ITV]V[PQR]TKRQSR[KR]NTPLPS[RK]
